# Supplementary material for: Don’t forget the trunk in Duchenne muscular dystrophy patients: more muscle weakness and compensation than expected
Source: J Neuroeng Rehabil. 2019 Mar 27;16:44. doi: 10.1186/s12984-019-0515-y (PMC6437973; doi:10.1186/s12984-019-0515-y)
Supplement: Supplementary file 1 — Maximum trunk angles. Median and interquartile ranges for maximum trunk angles during active trunk movements in healthy controls, DMD participants and DMD participants sorted by Brooke scale category. (XLSX 11 kb) [file 12984_2019_515_MOESM1_ESM.xlsx]

## Sheet: Blad1
		Healthy			DMD			Brooke 1			Brooke 2			Brooke 3			p-value HC vs DMD	p-value Brooke scale
		n	median	IQR	n	median	IQR	n	median	IQR	n	median	IQR	n	median	IQR
Active ROM trunk (°)	Flexion	22	77.2	[66.1-82.8]	16	46.5	[35.2-60.9]	6	50.6	[44.2-68.1]	6	51.6	[36.7-63.7]	4	39.6	[27.1-49.1]	<0.001	0.337
	Extension	23	-39.6	[-43.2--30.8]	13	-26.2	[-31.4--21.4]	5	-31.2	[-34.6--23.7]	5	-22.9	[-33.1--21.4]	3	-23.4	[-25.5--16.9]	0.01	0.484
	Lateral bending	25	49.5	[44.3-52.5]	15	32.4	[24.2-41.3]	6	35.6	[28.0-47.6]	5	38.9	[28.3-43.0]	4	24.1	[19.6-31.0]	<0.001	0.287
	Rotation	25	62.4	[53.5-74.8]	17	31.0	[22.7-41.2]	6	41.4	[37.9-43.0]	6	30.9	[23.7-40.6]	5	19.9	[17.8-27.8]	<0.001	0.014
