# Supplementary material for: Don’t forget the trunk in Duchenne muscular dystrophy patients: more muscle weakness and compensation than expected
Source: J Neuroeng Rehabil. 2019 Mar 27;16:44. doi: 10.1186/s12984-019-0515-y (PMC6437973; doi:10.1186/s12984-019-0515-y)
Supplement: Supplementary file 3 — Trunk ROM. Median and interquartile ranges trunk ROM when performing daily tasks in healthy controls, DMD participants and DMD participants sorted by Brooke scale category. (XLSX 15 kb) [file 12984_2019_515_MOESM3_ESM.xlsx]

## Sheet: Trunk ROM
			Healthy			DMD			Brooke 1			Brooke 2			Brooke 3			p-value HC vs DMD	p-value Brooke scale
			n	median	IQR	n	median	IQR	n	median	IQR	n	median	IQR	n	median	IQR
Trunk ROM frontal plane(°)	Reaching forward
		N-0	25	3.1	[1.9-6]	15	8.9	[5.7-11.1]	6	4.8	[3.7-6.8]	4	10.1	[8.8-11.3]	5	9.7	[8.6-11.5]	<0.001	0.105
		N-500	25	4.7	[3-8.2]	9	10.3	[6.9-22]	6	8.7	[5.9-10.3]	3	20.5	[19.9-31.4]	0	0	[.-.]	0.003	0.071
		F-0	25	6.3	[3.5-10.4]	12	14.1	[5.4-18.2]	6	5.4	[4.5-11.1]	5	19.1	[15.3-20]	1	16.4	[16.4-16.4]	0.011	0.053
	Reaching lateral
		N-0	25	7.8	[6.5-10.5]	16	10.3	[8.7-12.3]	6	9.8	[6.1-11.2]	5	9.9	[8-12.4]	5	12.8	[10-20.1]	0.100	0.250
		N-500	25	8.7	[7.6-10.8]	8	11.5	[8.4-17.1]	5	11.8	[7.6-19.9]	3	11.1	[9.1-13.6]	0	0	[.-.]	0.200	0.655
		F-0	25	10	[9.2-13.6]	11	22.7	[12.8-27.1]	6	24	[22.7-27.9]	4	19.2	[14-25.2]	1	7	[7-7]	0.003	0.178
	Reaching contra-lateral
		N-0	25	4.9	[2-8.7]	16	11.8	[6.8-17]	6	7.5	[5.3-8.9]	5	16.7	[16-19.4]	5	10.2	[6.1-14.3]	0.001	0.080
		N-500	25	8	[5.7-11.8]	8	12.4	[9.5-24.7]	5	10.3	[8.2-12.1]	3	25	[24.5-29.4]	0	0	[.-.]	0.042	0.025
	ADL
		Plate	24	7.5	[4.9-9.7]	15	11.5	[7.7-18.5]	6	9.6	[7.3-17.3]	4	9.8	[6.7-16.5]	5	12.2	[10.6-24.4]	0.004	0.337
		Drink	24	3	[1.8-4.6]	15	4.7	[3.6-7.7]	6	4.6	[4.1-6.2]	4	3.1	[2.9-3.7]	5	9.8	[6.9-21.7]	0.002	0.007
Trunk ROM sagittal plane(°)	Reaching forward
		N-0	25	4.3	[2.7-6.2]	15	7.1	[4.3-10.3]	6	5.6	[3-8.1]	4	5.8	[4.4-10.7]	5	10.6	[6.5-12.1]	0.015	0.267
		N-500	25	6.4	[4.1-9]	9	10.2	[7-14.6]	6	11.2	[4.3-12.4]	3	8.7	[8.1-27.7]	0	0	[.-.]	0.051	0.796
		F-0	25	13.3	[8.5-18.8]	12	8.7	[7.7-12]	6	7.8	[7.1-9.2]	5	9.5	[8.1-12.8]	1	13.1	[13.1-13.1]	0.140	0.354
	Reaching lateral
		N-0	25	4.6	[2.9-6.7]	16	7.8	[5.3-12.8]	6	5.3	[3.5-6.1]	5	8.5	[5.8-16.6]	5	10.4	[7.9-13.7]	0.018	0.072
		N-500	25	6.3	[4-12.1]	8	11.4	[8.8-18.3]	5	9.9	[7.4-16.5]	3	14.3	[11.9-20.2]	0	0	[.-.]	0.034	0.297
		F-0	25	7.2	[5-11.6]	11	12	[5.9-18]	6	13.1	[6.2-18.4]	4	14.3	[8.8-20.6]	1	3.7	[3.7-3.7]	0.107	0.287
	Reaching contra-lateral
		N-0	25	4.5	[3.2-8.8]	16	9.3	[5.8-13.2]	6	8.7	[4.8-10.8]	5	9.7	[6.4-13.7]	5	8.8	[5.8-13.5]	0.031	0.861
		N-500	25	5.7	[4.5-8]	8	9.6	[7-17.6]	5	10.2	[5.1-17.1]	3	9	[8.8-22.4]	0	0	[.-.]	0.042	0.655
	ADL
		Plate	24	7.7	[5.3-10.8]	15	10.6	[7.1-15.7]	6	9.5	[7.8-15.7]	4	13.2	[8-16.1]	5	10.6	[6.5-13.2]	0.063	0.929
		Drink	24	4.1	[3.1-8.1]	15	7.2	[3.5-10.1]	6	4.8	[4.1-10.2]	4	3	[2.3-5.8]	5	9.8	[8.1-11.9]	0.334	0.057
Trunk ROM transversal plane(°)	Reaching forward
		N-0	25	8.2	[4.9-13.1]	15	10.1	[6-13]	6	9.3	[7.7-10.9]	4	17.4	[12.6-20.1]	5	5.6	[4.6-8]	0.737	0.031
		N-500	25	11.9	[9.1-14.8]	9	13.5	[9.1-27.2]	6	12.6	[7.4-22.2]	3	22.1	[12.8-37.2]	0	0	[.-.]	0.435	0.606
		F-0	25	17.7	[12-22.9]	12	13.7	[9.6-19.5]	6	13.7	[9.5-18.9]	5	13.5	[9.2-20.4]	1	14.2	[14.2-14.2]	0.095	0.909
	Reaching lateral
		N-0	25	13.7	[9.6-17]	16	15.1	[12.7-20.4]	6	14	[12.4-15.5]	5	18.9	[12.8-20]	5	21.5	[13.3-25.5]	0.138	0.217
		N-500	25	19.7	[15.6-27.2]	8	19.7	[16.3-23.5]	5	20.4	[14.4-26.4]	3	19	[18.1-21.1]	0	0	[.-.]	0.983	0.881
		F-0	25	19.4	[15.2-23.8]	11	19.7	[18.1-27.6]	6	26.1	[18.5-30.6]	4	19.2	[17.7-23.7]	1	9.1	[9.1-9.1]	0.336	0.212
	Reaching contra-lateral
		N-0	25	15.1	[9.8-20.5]	16	14.4	[9.4-20]	6	12.5	[8.2-16]	5	19.7	[16.4-32.4]	5	10.3	[8-16.6]	0.947	0.204
		N-500	25	17.6	[13.1-24.4]	8	22.8	[12.4-28.6]	5	24.5	[18.8-29.4]	3	12.9	[11.4-25]	0	0	[.-.]	0.462	0.456
	ADL
		Plate	24	30.3	[24.4-36.2]	15	33.8	[28.9-41]	6	35	[23.4-44.3]	4	34.9	[32.1-40.2]	5	30.7	[29.4-38]	0.130	0.861
		Drink	24	3.5	[2.8-6]	15	5.3	[3.6-7.2]	6	3.5	[3.1-7.1]	4	5.2	[4.5-6.3]	5	6.9	[5.3-8.7]	0.137	0.239
